# Supplementary material for: Genome-wide association study (GWAS) of seed germination-related traits in rice and identification of candidate genes
Source: Research Square preprint supplement (doi:10.21203/rs.3.rs-312154/v1), 2021-03-15
Supplement: Supplementary file 1 [file 2704ca306a7de5a377be4ebe.docx]

**Suplementary Figures**


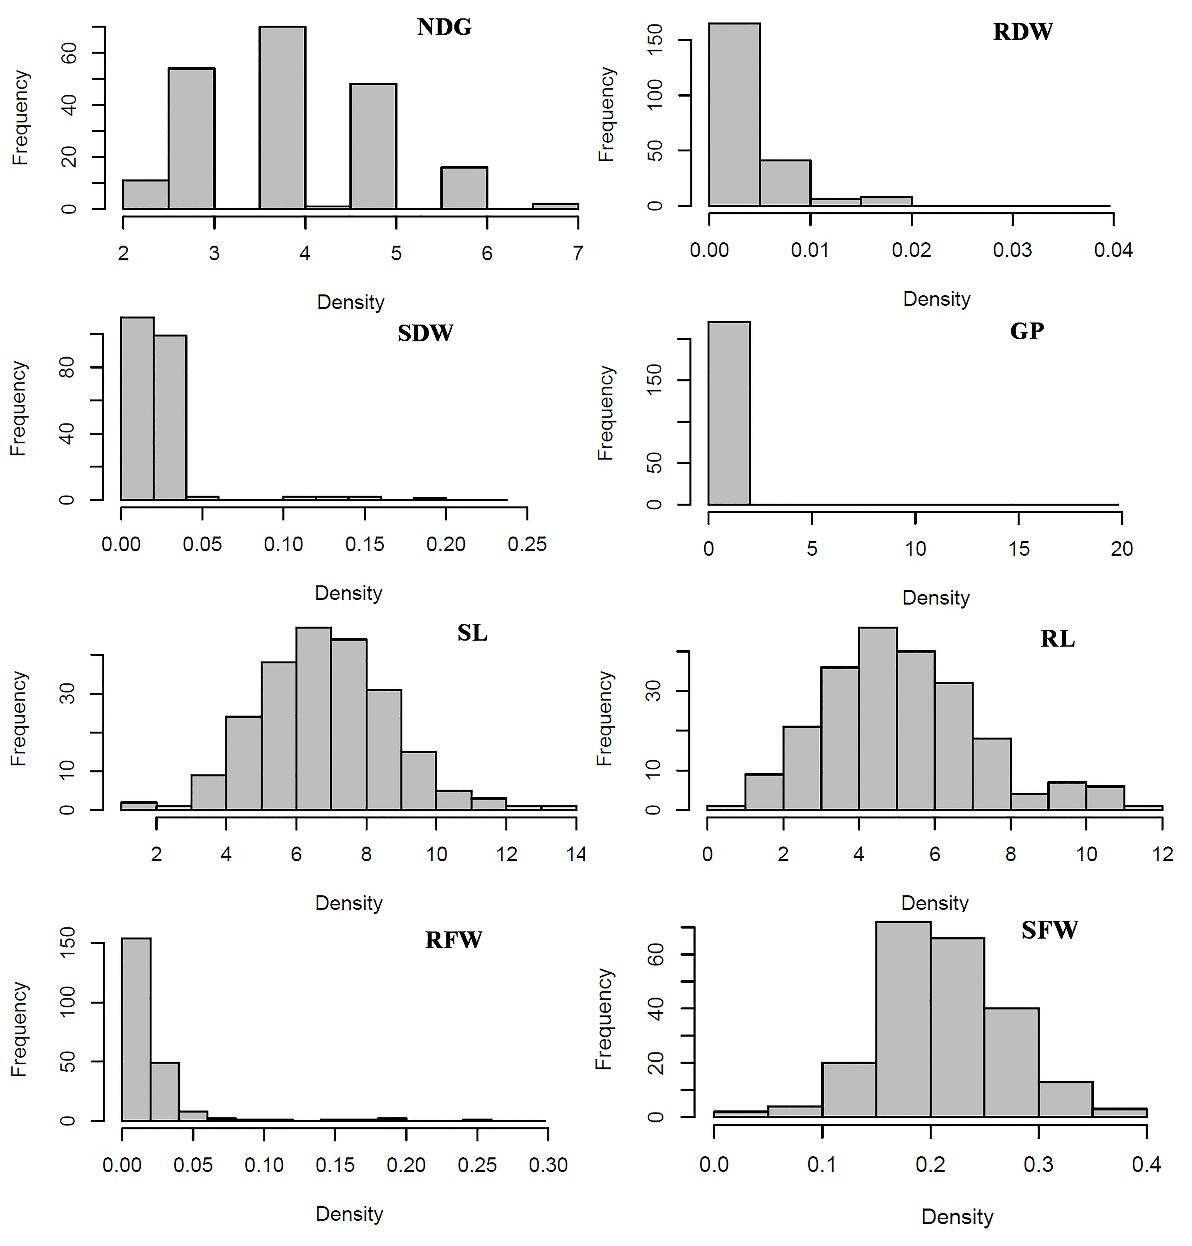


**Supplementary FIGURE 1** Distribution of different traitsincluding:NDG, RDW, SDW, GP, SL, RL, RFW, SFW.


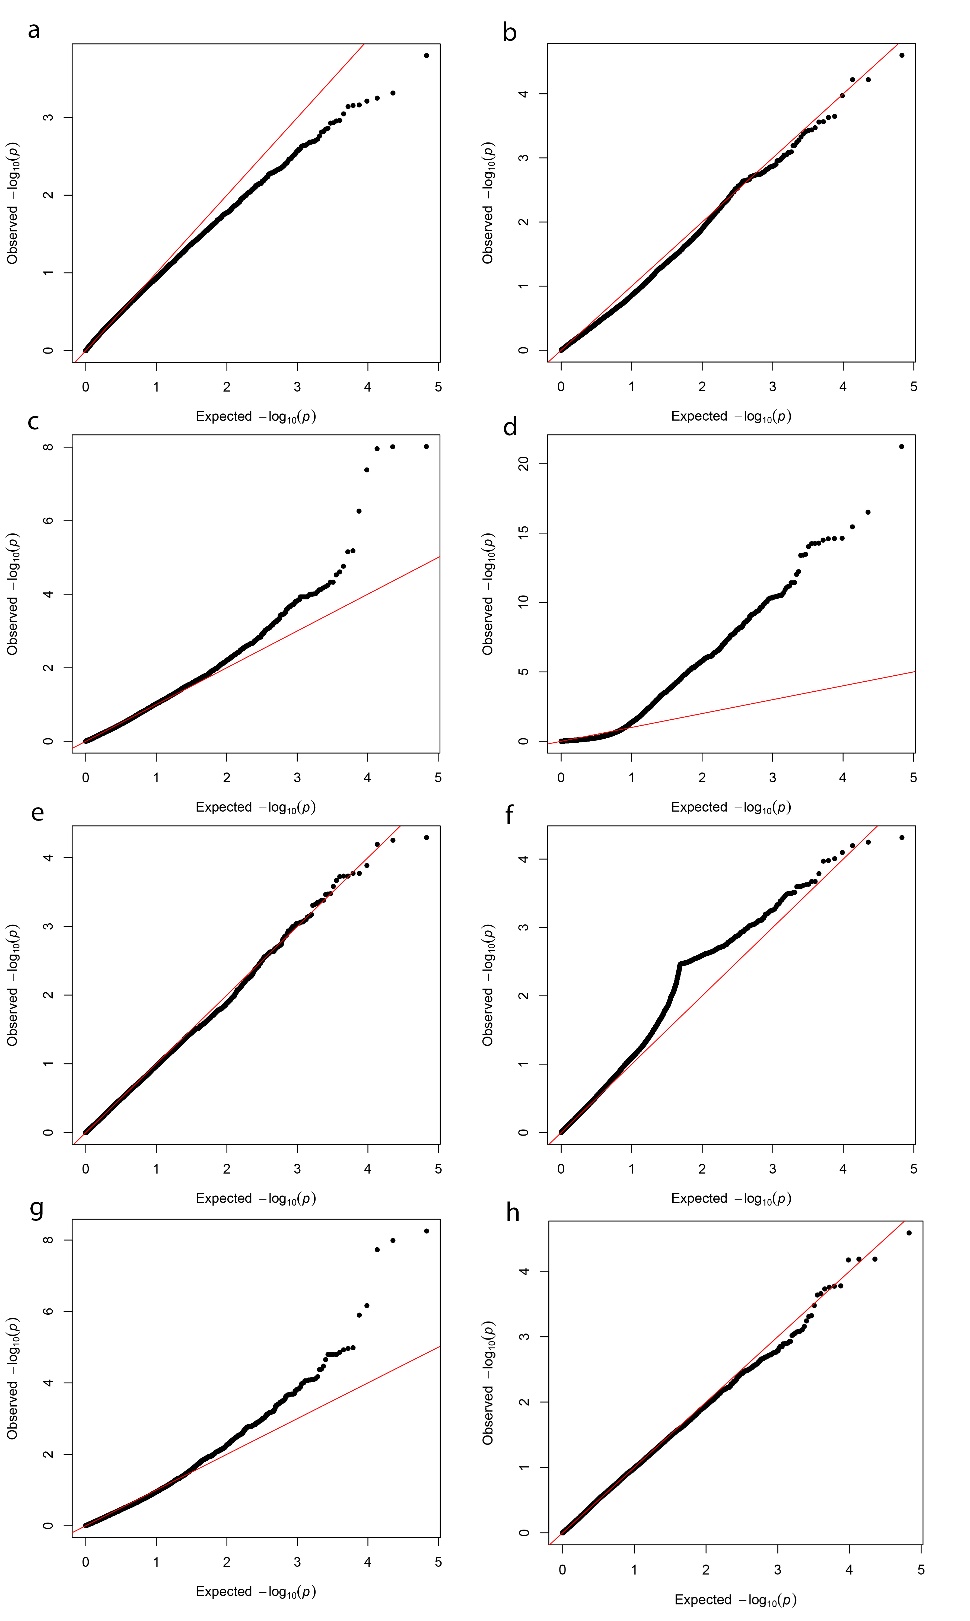


**Supplementary FIGURE 2** Q-Q plots of SNPs on rice genome.The observed and expected -log10 (*p*-values) from the GWAS were plotted for the studied traits including: a) NDG, b) RDW, c(SDW, d) GP, e) SL, f) RL, g) RFW, h) SFW.
